# Supplementary material
Source: HighWire-hosted journal article supplement (https://learnmem.cshlp.org/content/suppl/2016/02/04/23.3.108)
Supplement: Supplemental_Materials.docx [file Supplemental_Materials.docx]

**Supplementary materials:**

**Fig. S1.** A box plot resulting from one way ANOVA on item-wise averaged reaction times of every subject. The central red line in each box marks the median reaction time for that sequence item. The bottom and the top of each box represents 25th and 75th percentile respectively. The whiskers extend to the most extreme data points, excluding outliers, which are plotted separately as red crosses.

**Fig. S2.** *A.* The correlation between the chunking carry-over (Ci) and the progressive decrease in RT indicates that chunking benefits performance.

*B.* The correlation between the Ci and WM updating performance suggests that chunking depends on WM gating mechanisms.
